# Supplementary material
Source: Springer Nature journal article supplement (https://www.springermedizin.de/resource/supplementary/13075_2012_4437_MOESM10_ESM.pdf/10110406)
Supplement: MOESM10 [file 10110406]

# 1) Focal adhesion & cell-cell junctions (partial reversal)

REFERENCE NODE

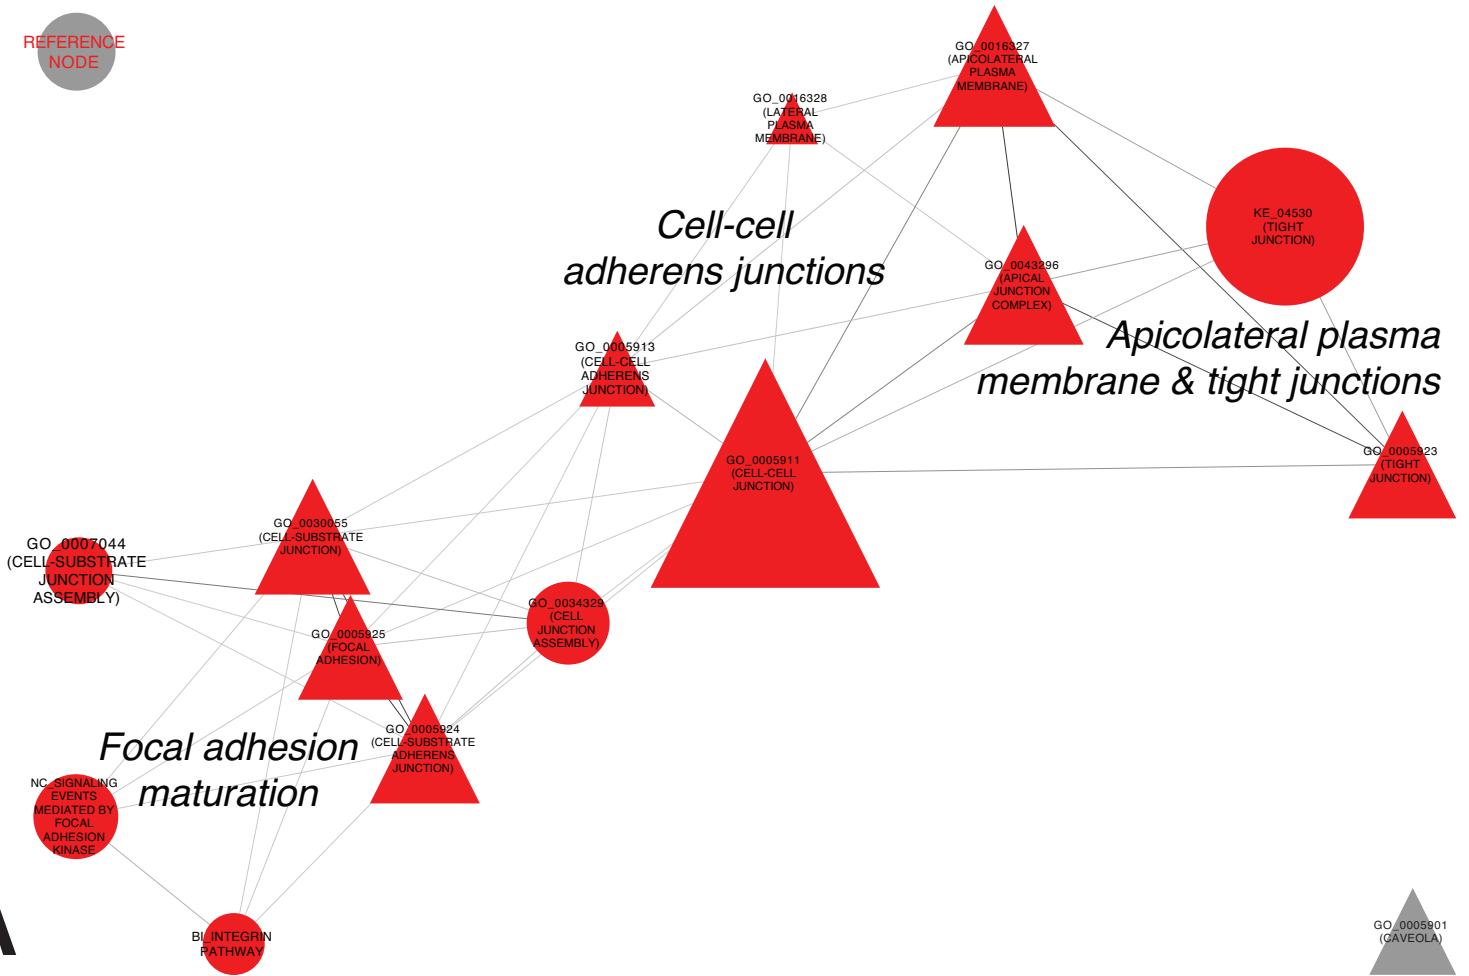

A

# 1) Focal adhesion & cell-cell junctions (partial reversal)

REFERENCE NODE

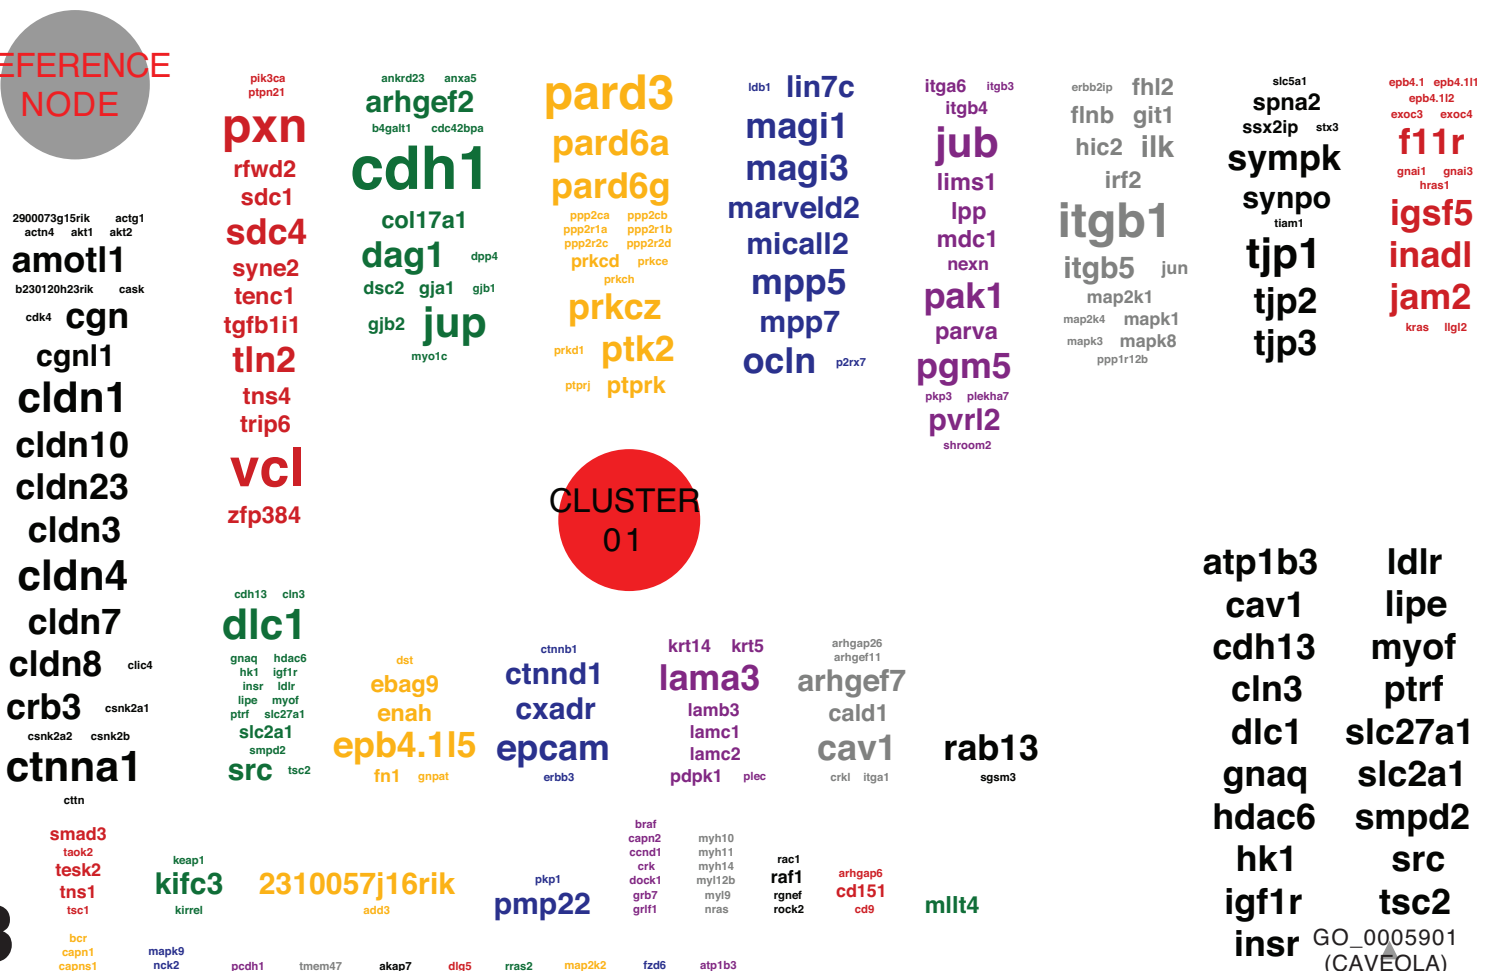

B
